# Supplementary material for: Probing the hierarchical dynamics of DNA-sperm nuclear transition protein complexes through fuzzy interaction and mesoscale condensation
Source: Royal Society of Chemistry journal article supplement (doi:10.1039/d3cp05957j), 2024-01-01
Supplement: d3cp05957j1.pdf [file d3cp05957j1.pdf]

## Supplementary Information

### Probing the hierarchical dynamics of DNA-sperm nuclear transition protein complex through fuzzy interaction and mesoscale condensation

Shangqiang Xie<sup>1</sup>, Congran Yue<sup>1</sup>, Sheng Ye<sup>1,2\*</sup>, Zhenlu Li<sup>1,2\*</sup>

<sup>1</sup>School of Life Science, Tianjin University, 92 Weijin Road, Tianjin 300072, China.

<sup>2</sup>Frontiers Science Center for Synthetic Biology (Ministry of Education), Tianjin Key Laboratory of Function and Application of Biological Macromolecular Structures, Tianjin University, 92 Weijin Road, Tianjin 300072, China

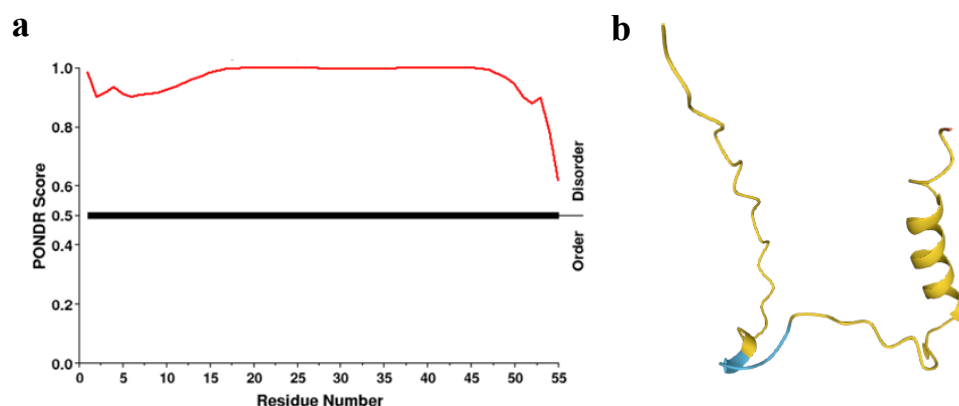

**Figure S1: Structural prediction of TNP1.** (a) Prediction of disorder regions via PONDR web server (<http://www.pondr.com/pondr-tut2>). (b) Structural prediction of TNP1 via AlphaFold 2 indicates overall intrinsic disorder. A small helix is predicted between residues 38 to 49, but the confidence is low.

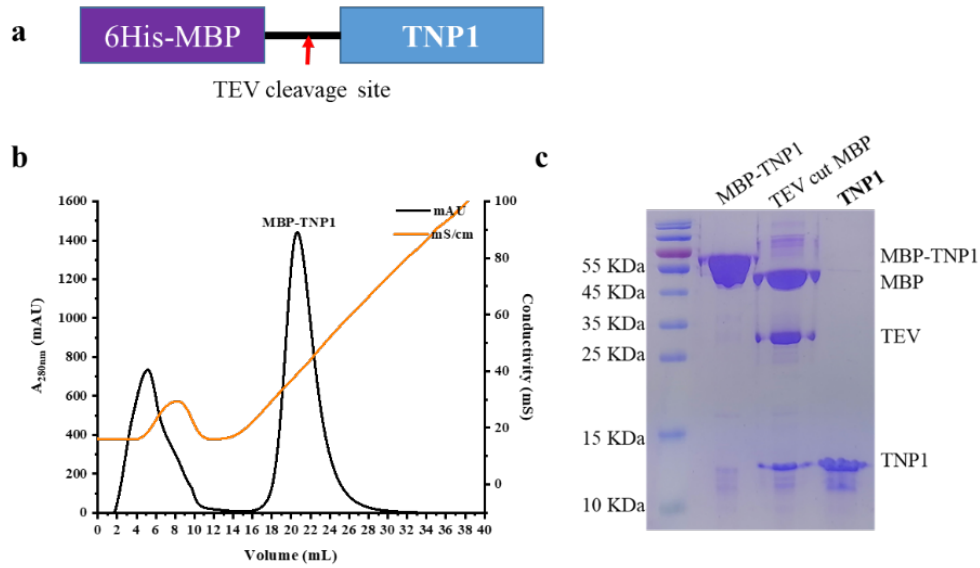

**Figure S2: Expression and Purification TNP1.** (a) Plasmid construct. (b) Anion-exchange chromatography with a HiTrap S column. (c) SDS-Page of MBP-TNP1, TEV cut MBP-tag and TNP1.

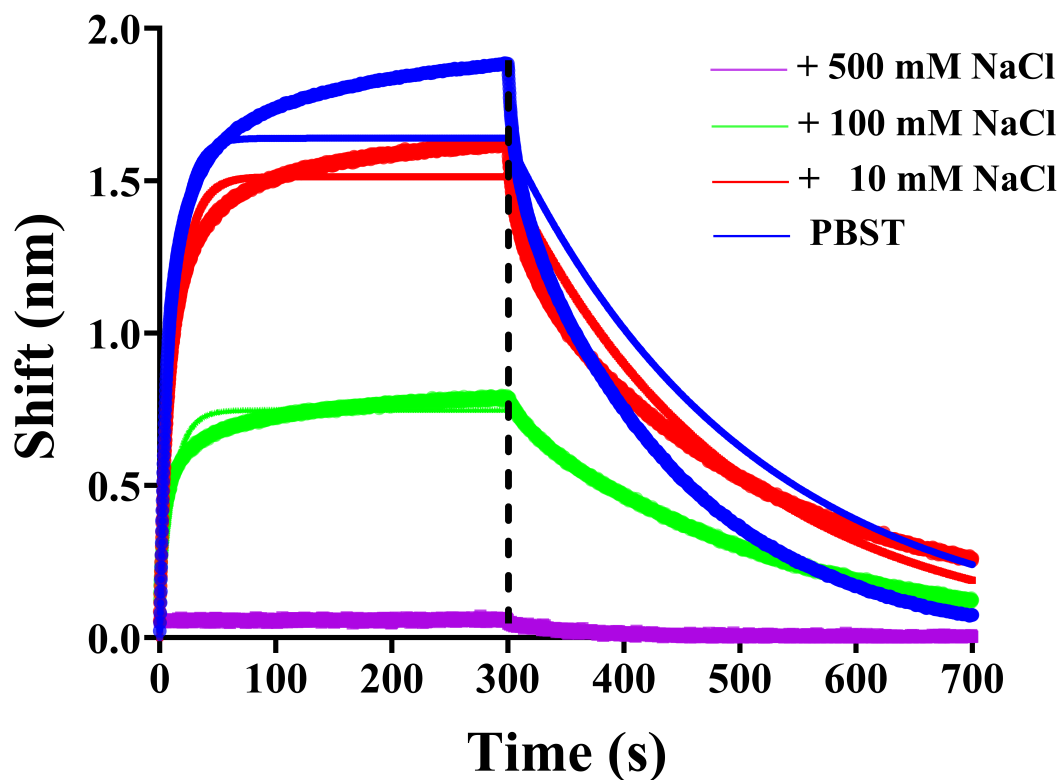

**Figure S3: Influence of Salt Concentration on the Association of TNP1 (4  $\mu$ M) with 177 bp DNA.** PBS-T buffers were supplemented with additional NaCl to elevate the salt concentration by increments of 10 mM, 100 mM, and 500 mM, respectively.

**Table S1: List of computational systems**

| Conventional MD Simulation |                      |                      |                      |                      |
|----------------------------|----------------------|----------------------|----------------------|----------------------|
|                            | 1 <sup>st</sup> TNP1 | 2 <sup>nd</sup> TNP1 | 3 <sup>rd</sup> TNP1 | 4 <sup>th</sup> TNP1 |
| Time                       | 100 ns               | 100 ns               | 100 ns               | 100 ns               |
| Repeat                     | 3                    | 3                    | 3                    | 3                    |
| Number of TNP1             | 1                    | 2                    | 3                    | 4                    |
| Number of DNA              | 1                    | 1                    | 1                    | 1                    |
| Number of water            | ~ 69500              |                      |                      |                      |
| Number of ions             | 455                  | 436                  | 417                  | 398                  |

| MetaDynamics & Conventional MD Simulation |                         |                         |
|-------------------------------------------|-------------------------|-------------------------|
|                                           | MetaDynamics Simulation | Conventional Simulation |
| Time                                      | 20 ns                   | 30 ns                   |
| Repeat                                    | 20                      |                         |
| Number of TNP1                            | 1                       |                         |
| Number of DNA                             | 1                       |                         |
| Number of water                           | ~ 70000                 |                         |
| Number of ions                            | 455                     |                         |

| WCA potential based MesoMD Simulation |                     |                     |                     |                     |                     |
|---------------------------------------|---------------------|---------------------|---------------------|---------------------|---------------------|
|                                       | $R_{\pm j_c} = 0.3$ | $R_{\pm j_c} = 0.5$ | $R_{\pm j_c} = 0.7$ | $R_{\pm j_c} = 1.0$ | $R_{\pm j_c} = 1.4$ |
| Time                                  | 100 ns              |                     |                     |                     |                     |
| Repeat                                | 3                   |                     |                     |                     |                     |
| Number of TNP1                        | 30                  | 60                  | 90                  | 120                 | 180                 |
| Number of DNA                         | 30                  |                     |                     |                     |                     |
| Number of water                       | Implicit Solvent    |                     |                     |                     |                     |
| Number of ions                        | 2970                | 3540                | 4110                | 4680                | 5820                |

First TNP1 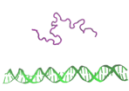

|         | Van der Wall Energy    | Electrostatic energy     | Polar solvation Energy  | SASA Energy          | Binding Energy           |
|---------|------------------------|--------------------------|-------------------------|----------------------|--------------------------|
| #1      | -651.540<br>+/- 76.650 | -8829.372 +/-<br>181.557 | 4639.679<br>+/- 283.160 | -93.792<br>+/- 7.023 | -4935.025<br>+/- 79.020  |
| #2      | -378.791<br>+/- 52.874 | -8660.352<br>+/-198.607  | 3346.314<br>+/- 273.093 | -68.419 +/-<br>4.411 | -5461.248<br>+/- 179.771 |
| #3      | -324.959<br>+/- 39.065 | -8887.285<br>+/- 243.068 | 3932.756<br>+/- 347.091 | -62.877<br>+/- 5.524 | -5342.365<br>+/- 123.070 |
| Average |                        |                          |                         |                      | -5246.212<br>+/-275.97   |

Second TNP1 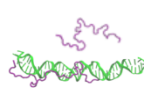

|         | Van der Wall Energy    | Electrostatic energy     | Polar solvation Energy  | SASA Energy          | Binding Energy           |
|---------|------------------------|--------------------------|-------------------------|----------------------|--------------------------|
| #1      | -587.869<br>+/- 63.608 | -6999.452<br>+/-156.402  | 3992.172<br>+/- 297.726 | -73.851<br>+/- 6.181 | -3669.001<br>+/- 182.723 |
| #2      | -711.902<br>+/- 38.798 | -6996.487<br>+/-144.507  | 4092.904<br>+/- 279.643 | -86.490<br>+/- 4.466 | -3701.975<br>+/- 148.780 |
| #3      | -370.879<br>+/- 38.185 | -7013.783<br>+/- 117.377 | 3529.047<br>+/- 120.218 | -51.000<br>+/- 2.596 | -3906.615<br>+/- 77.901  |
| Average |                        |                          |                         |                      | -3759.197<br>+/-128.73   |

Third TNP1 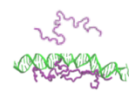

|         | Van der Wall Energy    | Electrostatic energy     | Polar solvation Energy  | SASA Energy           | Binding Energy           |
|---------|------------------------|--------------------------|-------------------------|-----------------------|--------------------------|
| #1      | -486.518<br>+/- 84.552 | -3891.004 +/-<br>546.778 | 1808.582<br>+/- 696.887 | -61.371<br>+/- 10.907 | -2630.310<br>+/- 269.427 |
| #2      | -462.690<br>+/- 56.904 | -4932.031<br>+/-117.716  | 3494.612<br>+/- 216.437 | -66.063<br>+/- 5.541  | -1966.173<br>+/- 116.028 |
| #3      | -628.160<br>+/- 83.321 | -5029.440<br>+/- 150.782 | 3765.859<br>+/- 334.494 | -84.525<br>+/- 7.614  | -1976.267<br>+/- 165.080 |
| Average |                        |                          |                         |                       | -2190.92<br>+/- 380.56   |

Fourth TNP1 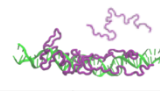

|         | Van der Wall Energy    | Electrostatic energy    | Polar solvation Energy  | SASA Energy          | Binding Energy          |
|---------|------------------------|-------------------------|-------------------------|----------------------|-------------------------|
| #1      | -595.611<br>+/- 58.761 | -3160.143<br>+/-87.944  | 2844.414<br>+/- 231.137 | -74.129<br>+/- 7.279 | -984.469<br>+/- 168.636 |
| #2      | -362.525<br>+/- 52.674 | -2603.994<br>+/-113.947 | 2361.422<br>+/- 255.034 | -53.504<br>+/- 4.802 | -658.601<br>+/- 171.609 |
| #3      | -224.661<br>+/- 27.328 | -2287.626<br>+/- 47.519 | 1758.375<br>+/- 153.874 | -35.141<br>+/- 3.339 | -789.052<br>+/- 134.925 |
| Average |                        |                         |                         |                      | -810.71<br>+/- 164.01   |

**Figure S4:** MMPBSA energy for sequential binding of the first, second, third, and fourth TNP1 to a DNA molecule (40 bp). Solute dielectric constant is set as 8.0. Energy unit is KJ/mol.

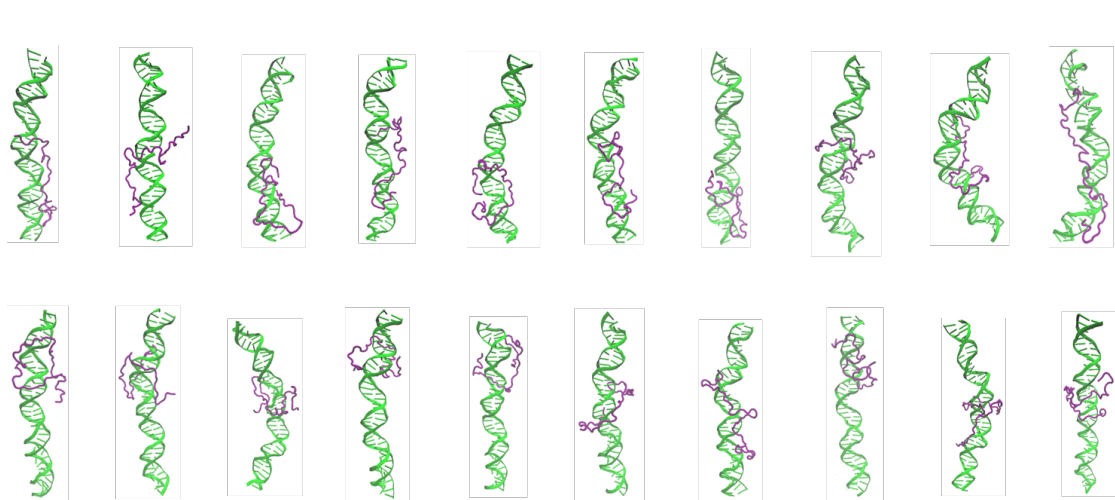

**Figure S5:** Final configurations of TNP1-DNA complex in 20 sets of MD simulations.

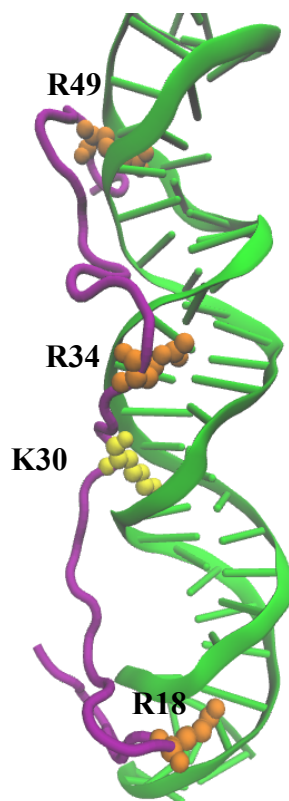

**Figure S6:** Depictions of arginine and lysine insertion into DNA grooves. A minimum distance threshold of 5 angstroms was utilized to determine the insertion of either the guanidinium group of arginine or the  $\epsilon$ -amino group of lysine into the DNA groove based on their proximity to the O2 of thymine.

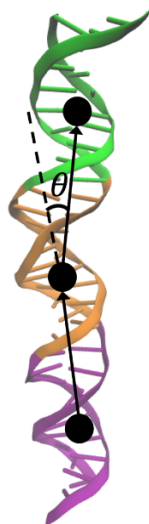

**Figure S7:** A segment (marked in purple, orange, and green) consists of arbitrary 10 connected base pairs. In each segment, the heavy atoms of the DNA backbone (adenine (A) and guanine (G) for purine bases, and thymine (T) and cytosine (C) for pyrimidine bases) are chosen, and the geometric center of the segment is calculated. The bending angle is defined as the cross angle between the vector connecting the center of  $(i-1)^{\text{th}}$  and  $i^{\text{th}}$  segment and the vector connecting the center of  $i^{\text{th}}$  and  $(i+1)^{\text{th}}$  segment.

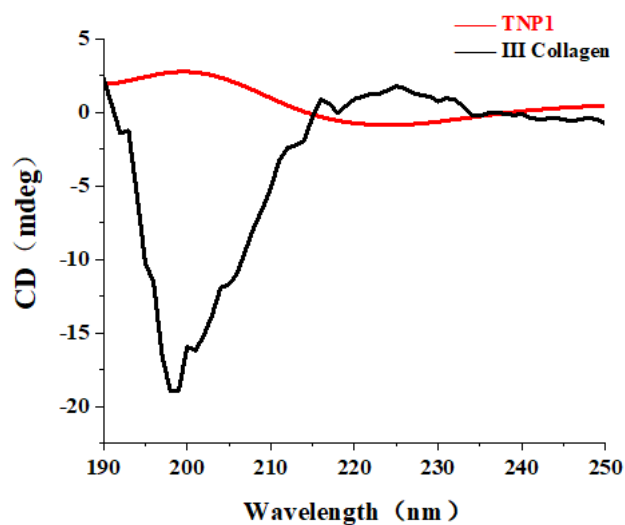

**Figure S8: CD spectrum of TNP1.** The signal intensity is low, and DichroWeb analysis (<http://dichroweb.cryst.bbk.ac.uk/html/home.shtml>) indicates that TNP1 lacks secondary structure. The black line represents a typical CD spectrum of collagen-like triple-helical secondary structure, which is characterized by a positive peak at 221 nm and a negative peak at 198 nm.

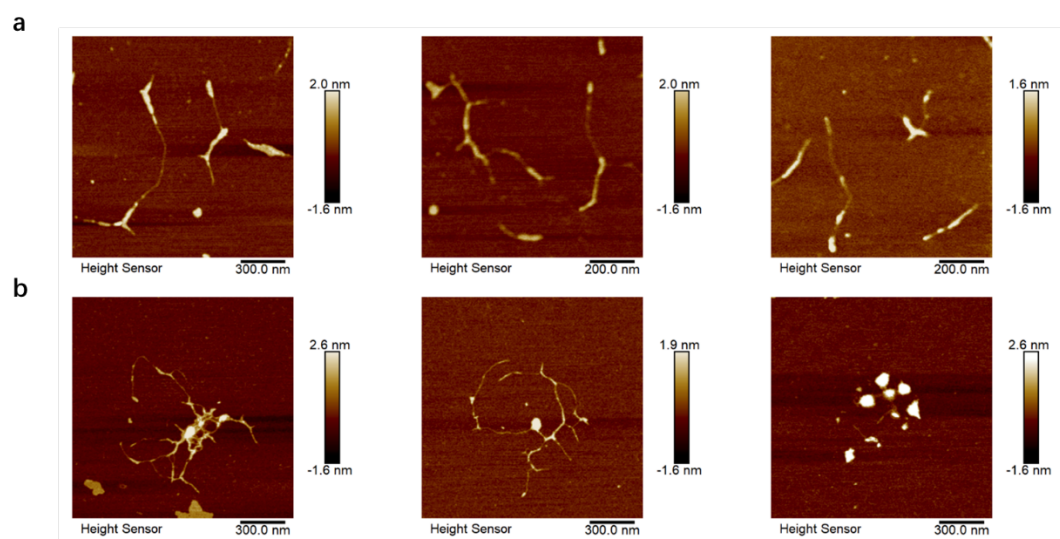

**Figure S9:** AFM images of (a) pure DNA (1.5  $\mu\text{M}/\text{bp}$ ) and (b) DNA-TNP1 complex (DNA of 0.3  $\mu\text{M}/\text{bp}$  and TNP1 of 0.1  $\mu\text{M}$ )

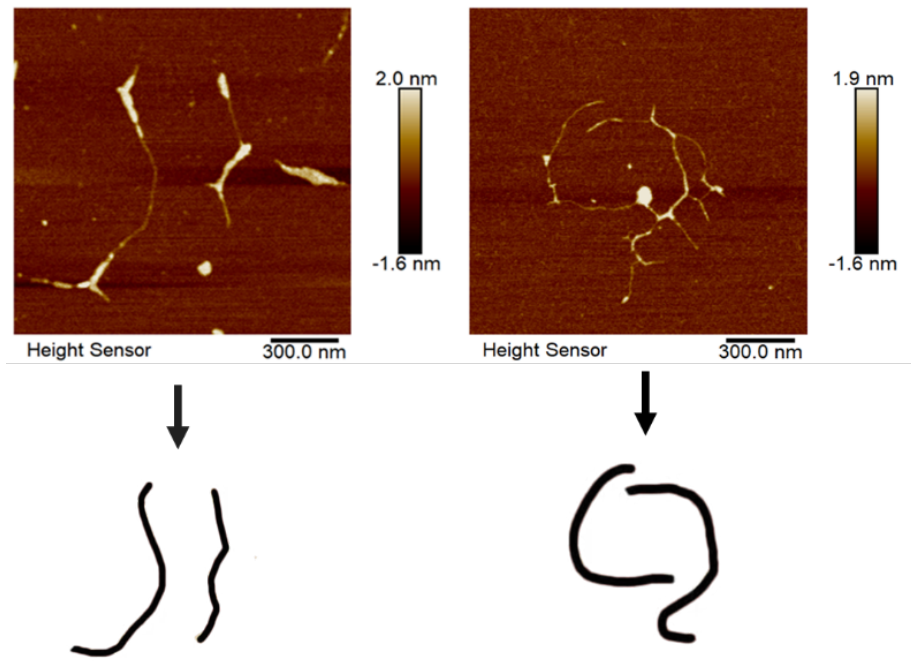

**Figure S10:** Extraction of DNA contour from AFM images.

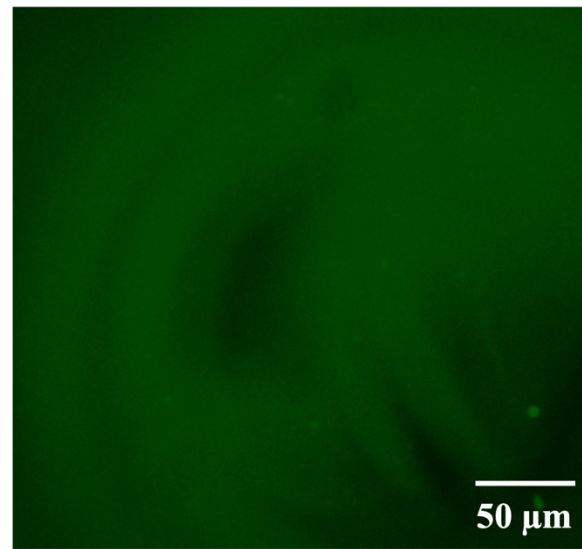

5 μM eGFP-TNP1+ 120 μM/bp DNA

**Figure S11:** Fluorescence imaging of 120 μM/bp DNA mixing with 5 μM eGFP-TNP1.

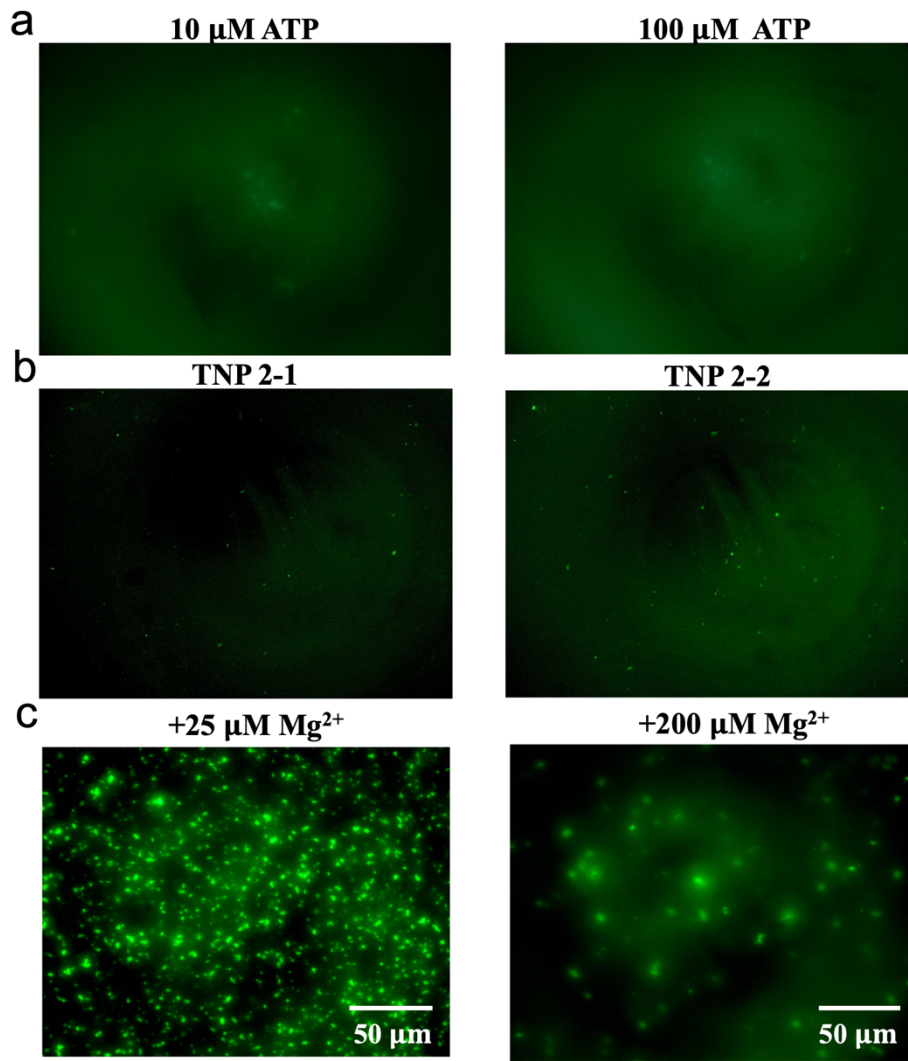

**Figure S12: Fluorescence images under different experimental conditions.** (a) Fluorescent images depicting the mixture of 10  $\mu\text{M}$  eGFP-TNP1 with either 10  $\mu\text{M}$  or 100  $\mu\text{M}$  ATP. (b) Fluorescent images of the mixture of eGFP-TNP1 2-1 or eGFP-TNP1 2-2 with 177 bp DNA. Various  $R_{+/-}$  ratios were measured in all cases, revealing either no or very weak phenomena of droplet formation. Two representative images are presented here. (c) Addition of 25  $\mu\text{M}$  or 200  $\mu\text{M}$   $\text{Mg}^{2+}$  into preformed droplet systems of eGFP-TNP1: 177 bp DNA mixture.

**Table S2: Utilization of Various DNA in the Conducted Assays**

| DNA Length | Assays                                                                                                                                           |
|------------|--------------------------------------------------------------------------------------------------------------------------------------------------|
| 40 bp      | Molecular Dynamics (MD) Simulation                                                                                                               |
| 177 bp     | Gel Electrophoresis, Bio-layer Interferometry, Measurement of $\zeta$ -Potential,<br>CD Spectrum, Dynamic Light Scattering, Fluorescence Imaging |
| 3043 bp    | Atomic Force Microscopy (AFM)                                                                                                                    |
